# Supplementary material
Source: PubMed Central journal article supplement (PMC4378107)

## Supplemental File

**Figure S1. Knock-down of WNK1 expression using siRNA WNK1 (h2) decreases BK $\alpha$  protein expression in HEK BK $\alpha$  cells.** HEK BK $\alpha$  cells were transfected with either scramble control siRNA or siRNA WNK1(h2) at 45 nM. Forty-eight hours after transfection, cells were lysed and subjected to SDS-PAGE and western blot analysis. **A** shows representative immunoblots for WNK1, BK and actin. **B** indicates a bar graph showing mean  $\pm$  SD band densities of BK protein expression from four independent experiments. The knock-down of WNK1 expression significantly decreases total BK protein expressions ( $32.7 \pm 18.9$  % in siRNA WNK1 (h2) vs  $100 \pm 15.3$  % in control siRNA,  $n=4$ ,  $p < 0.001$ ).

**Figure S1**

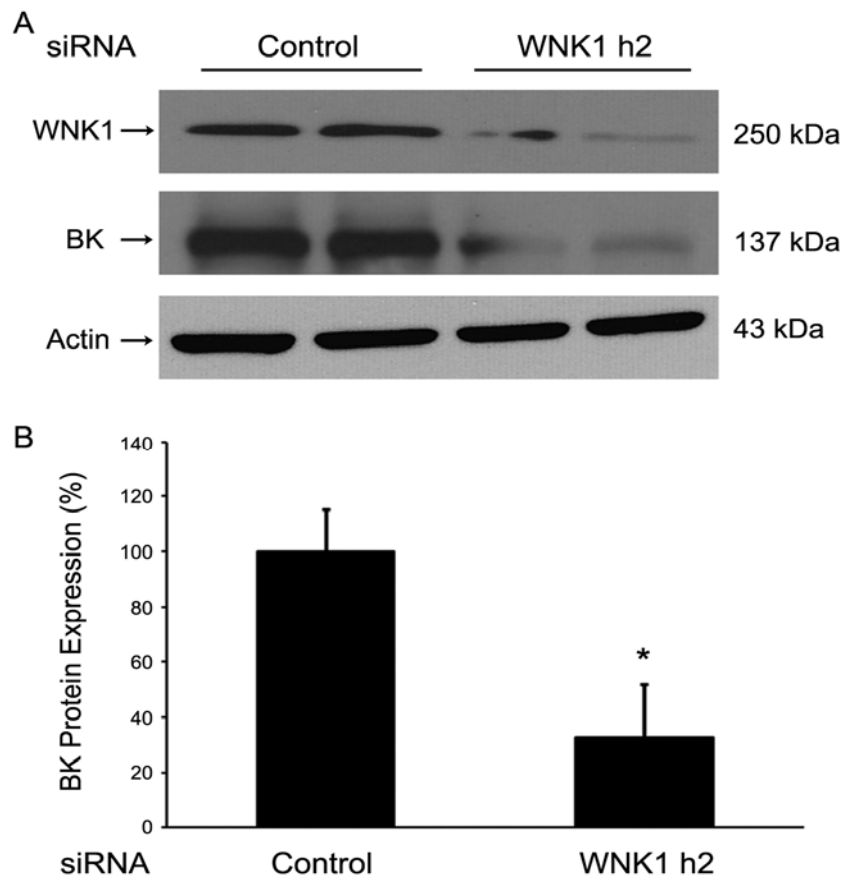

Supplement: ASN.2014020186_ASN2014020186SupplementaryData.pdf [file ASN.2014020186_ASN2014020186SupplementaryData.pdf]
